# Supplementary material for: NafA Negatively Controls Neisseria meningitidis Piliation
Source: PubMed Central journal article supplement (PMC3128610; doi:10.1371/journal.pone.0021749), 2011-07-01
Supplement: pone.0021749.s001.pdf [file pone.0021749.s001.pdf]

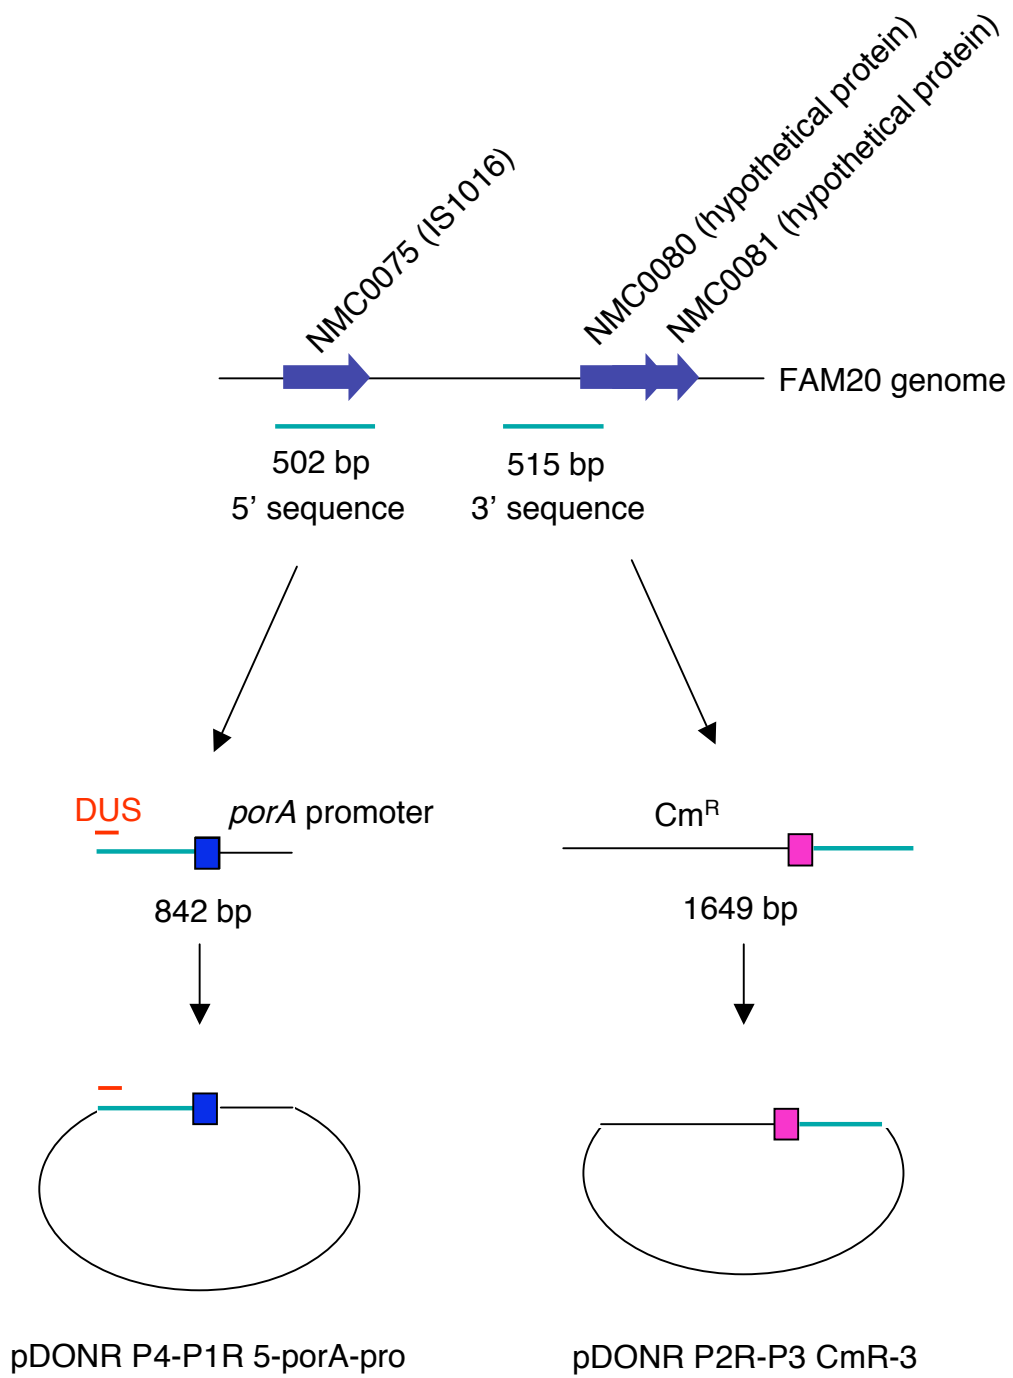

Fig. S1
